# Supplementary material for: A sustainable iron-catalyzed aerobic oxidative C–C and C–O bond cleavage of a lignin model to phenol and methyl benzoate
Source: Royal Society of Chemistry journal article supplement (doi:10.1039/d2cy01763f), 2023-01-01
Supplement: d2cy01763f1.pdf [file d2cy01763f1.pdf]

# A sustainable iron-catalyzed aerobic oxidative C-C and C-O bond cleavage of lignin model to phenol and methyl benzoate

Shaoyuan Guo<sup>a</sup>, Xinli Tong<sup>\*,a</sup>, Lingwu Meng<sup>a</sup>, and Guobao Yang<sup>a</sup>

<sup>a</sup> Tianjin Key Laboratory of Organic Solar Cells and Photochemical Conversion, School of Chemistry and Chemical Engineering, Tianjin University of Technology, Tianjin 300384, P. R. China.

\* E-mail address: tongxinli@tju.edu.cn or tongxli@sohu.com.

## Supporting Information

### 1. The aerobic oxidative cleavage processes of lignin model with iron catalysts

The results of the oxidative cleavage of lignin model with several iron-based catalysts are provided in the Table S1. It can be seen that 47.1% conversion of **1** was attained with the Fe<sub>3</sub>C + C as catalyst system, in which the yields of **2** and **3** were 42.8% and 4.3%, respectively. Both the conversion and product yields are near to those with the single Fe<sub>3</sub>C as catalyst. It showed that the synergy effect in the used Fe-N-C-850 catalyst is greatly significant to the oxidation reaction. Moreover, when the Fe-glu-800, Fe-xylan-800 and Fe-phen-glu-800 were used as catalysts for the oxidative cleavage processes of **1**, the conversion of substrate was respectively 22.9%, 19.7% and 39.7%, which showed that the preparation methods are closely related to the activities of iron-based catalysts.

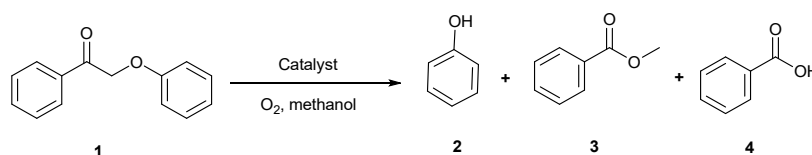

**Table S1.** The oxidative transformation of **1** with different iron catalysts<sup>a</sup>

| Entry | Catalysts             | Conv. (%) <sup>b</sup> | The yield of product (%) <sup>b</sup> |          |                   |
|-------|-----------------------|------------------------|---------------------------------------|----------|-------------------|
|       |                       |                        | <b>2</b>                              | <b>3</b> | <b>4 + others</b> |
| 1     | Fe <sub>3</sub> C + C | 47.1                   | 42.8                                  | 4.3      | -                 |
| 2     | Fe-glu-800            | 22.9                   | 9.0                                   | 3.8      | -                 |
| 3     | Fe-xylan-800          | 19.7                   | 8.8                                   | 3.2      | -                 |
| 4     | Fe-phen-glu-800       | 39.7                   | 13.3                                  | 3.3      | -                 |

<sup>a</sup> Reaction conditions: 0.1 g of **1**, 0.025 g catalyst, in 17 mL methanol solvent, with 0.3 Mpa of O<sub>2</sub> pressure, at 120 °C, for 2 h;

<sup>b</sup> The conversion and selectivity of product were attained by GC using the internal standard method.

## 2. The effects of additives on oxidative transformation of 2-phenoxy-1-phenyl ethanone

The effects of amine derivatives as additives on the oxidative transformation of **1** were investigated and the obtained results are given in the Table S2.

**Table S2.** The oxidative transformation of **1** with different additives <sup>a</sup>

| Entry | Additive         | Conv. (%) <sup>b</sup> | The yield of product (%) <sup>b</sup> |          |          |
|-------|------------------|------------------------|---------------------------------------|----------|----------|
|       |                  |                        | <b>2</b>                              | <b>3</b> | <b>4</b> |
| 1     | aniline          | 85.3                   | 85.2                                  | 11.7     | -        |
| 2     | ammonium acetate | 98.2                   | 71.5                                  | 22.7     | -        |
| 3     | ammonia          | 98.2                   | 97.9                                  | 31.9     | -        |

<sup>a</sup> Reaction conditions: 0.1 g of **1**, 0.025 g of Fe-N-C-850 catalyst, in 17 mL methanol, under 0.3 Mpa of O<sub>2</sub> pressure, at 120 °C, for 2 h;

<sup>b</sup> The conversion and selectivity of product were attained by GC using the internal standard method.

## 3. The GC and GC-MS spectra of obtained products

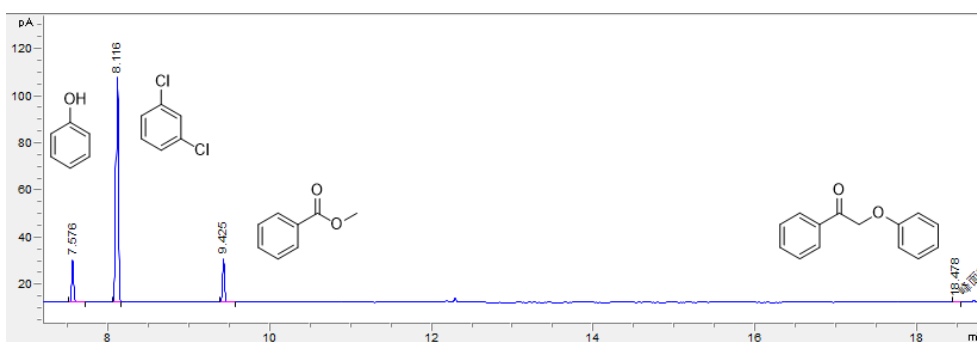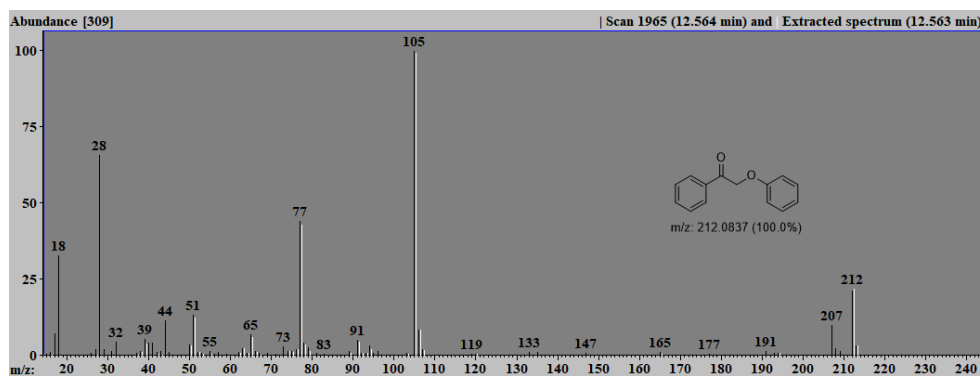

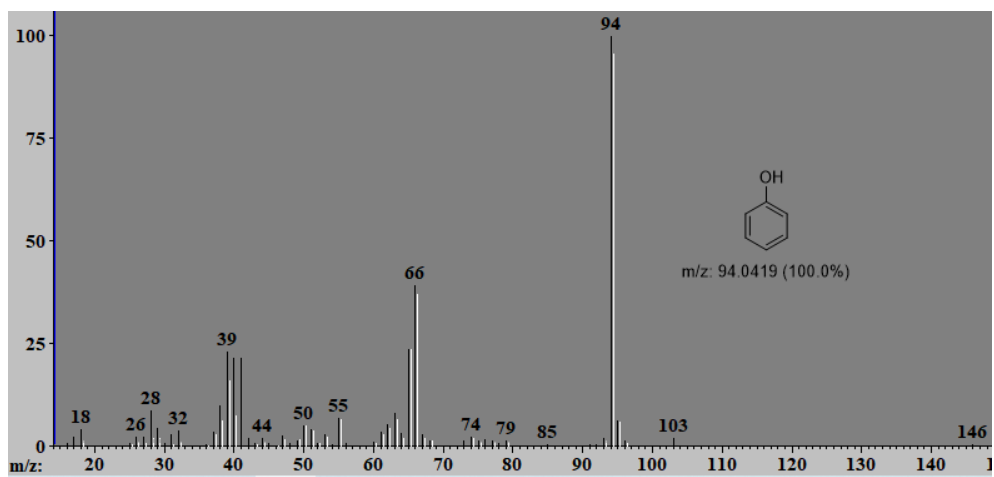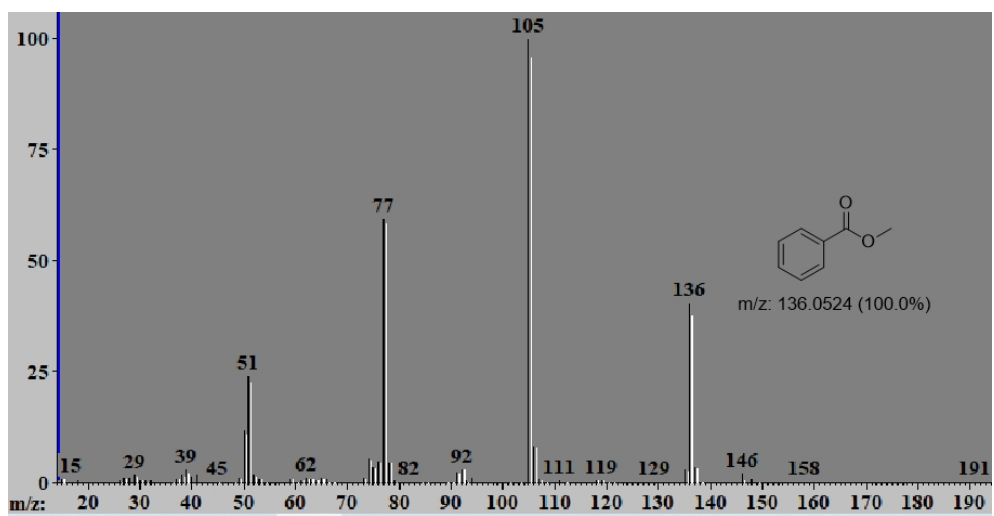

Figure S1. The GC and GC-MS spectra for the reaction of 2-phenoxy-1-phenyl ethanone in the methanol solvent

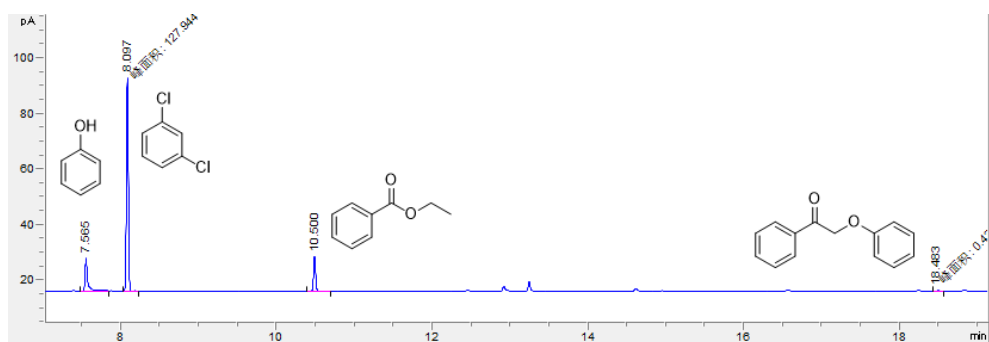

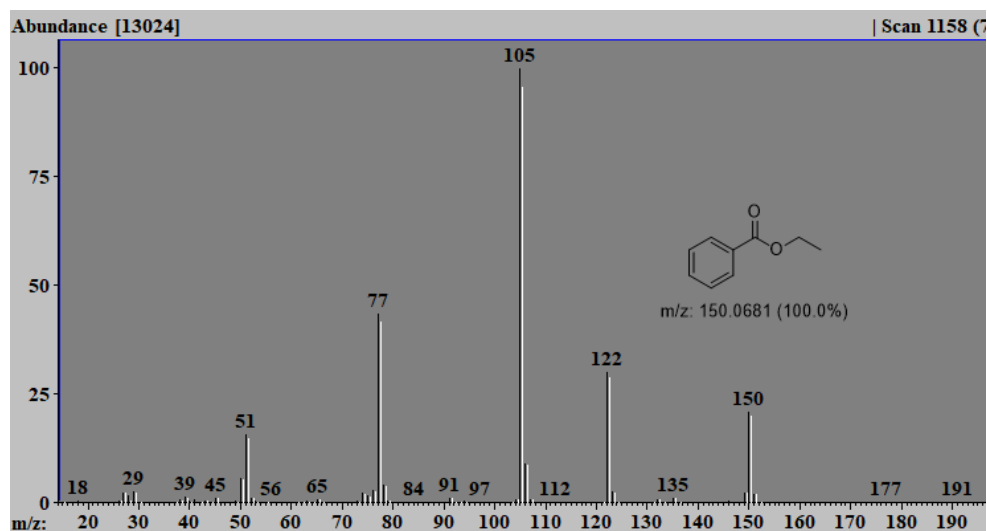

Figure S2. The GC and GC-MS spectra of the reaction of 2-phenoxy-1-phenyl ethanone in the ethanol solvent

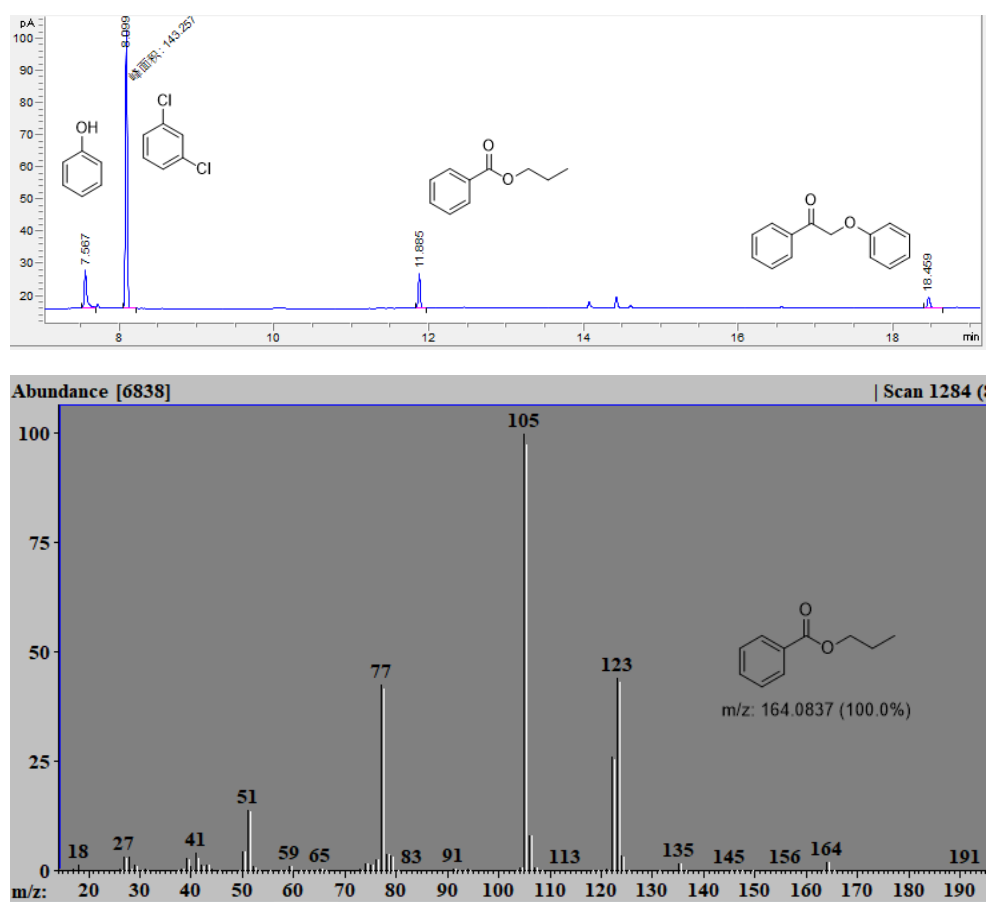

Figure S3. The GC and GC-MS spectra for the reaction of 2-phenoxy-1-phenyl ethanone in the n-propanol

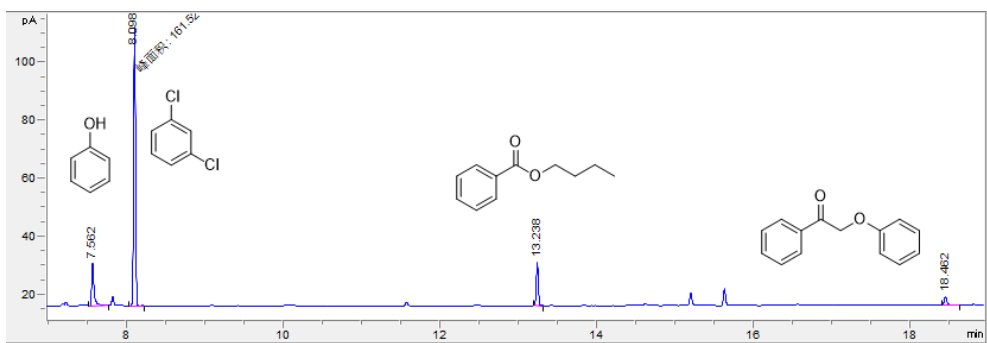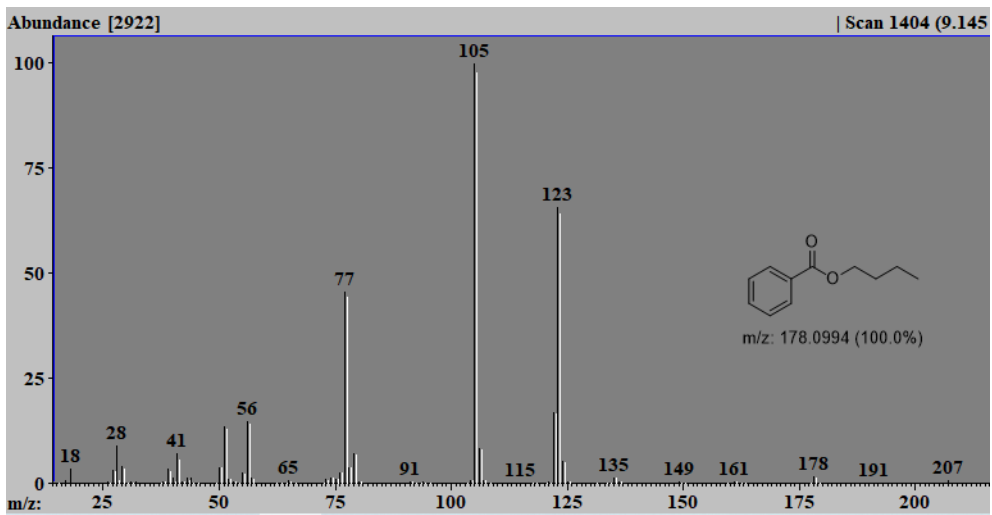

Figure S4. The GC and GC-MS spectra for the reaction of 2-phenoxy-1-phenylethanone in the n-butanol

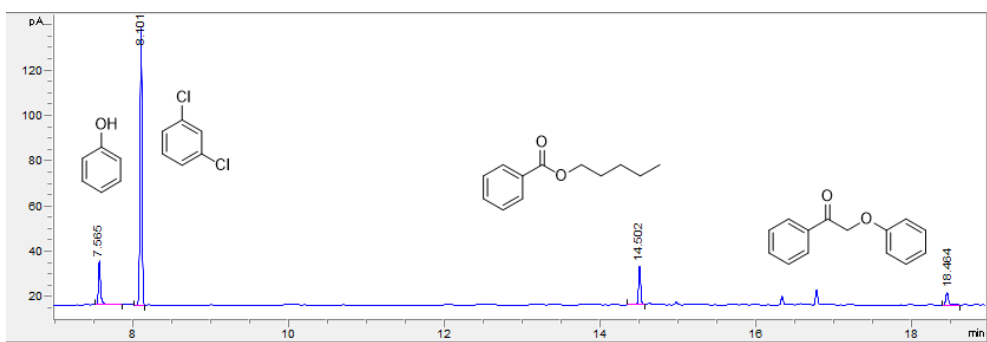

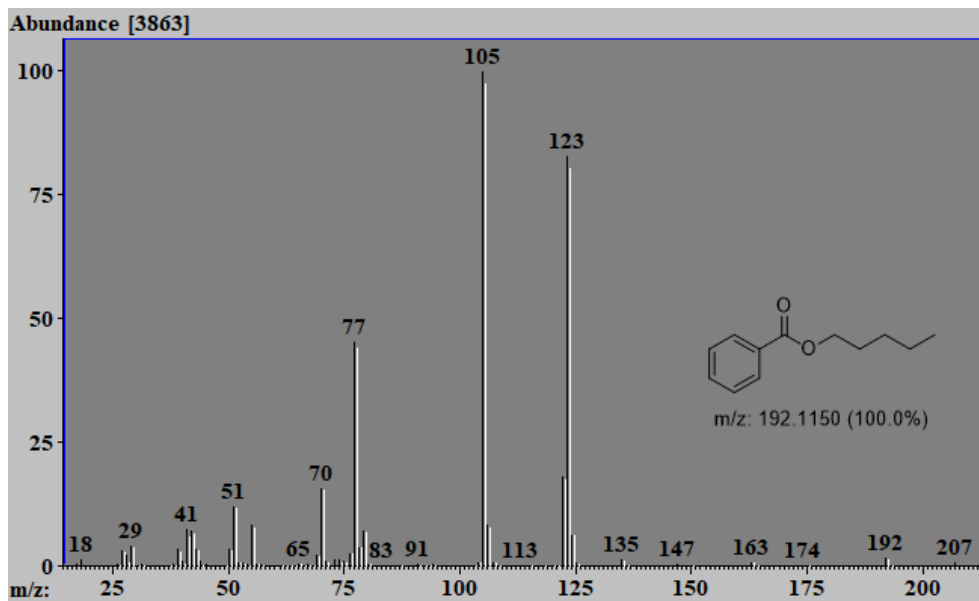

Figure S5. The GC and GC-MS spectra for the reaction of 2-phenoxy-1-phenyl ethanone in the n-pentanol

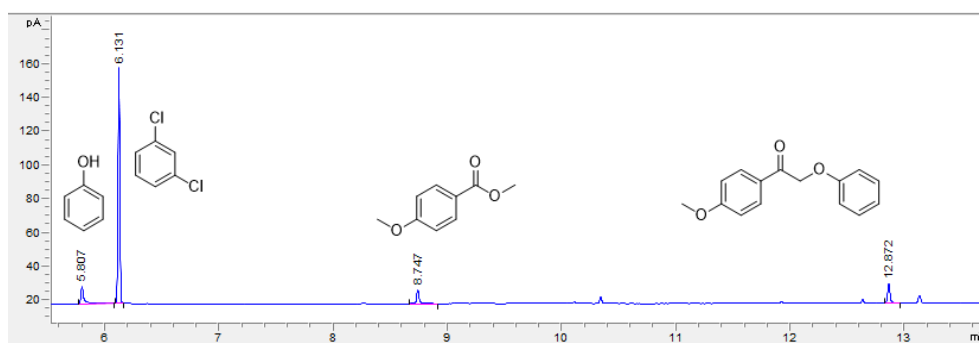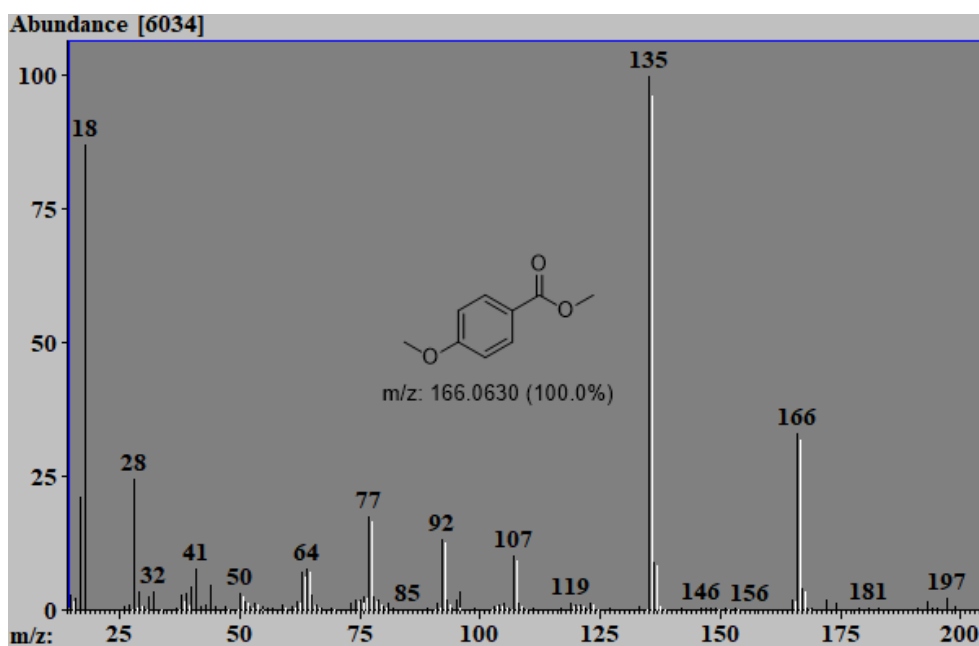

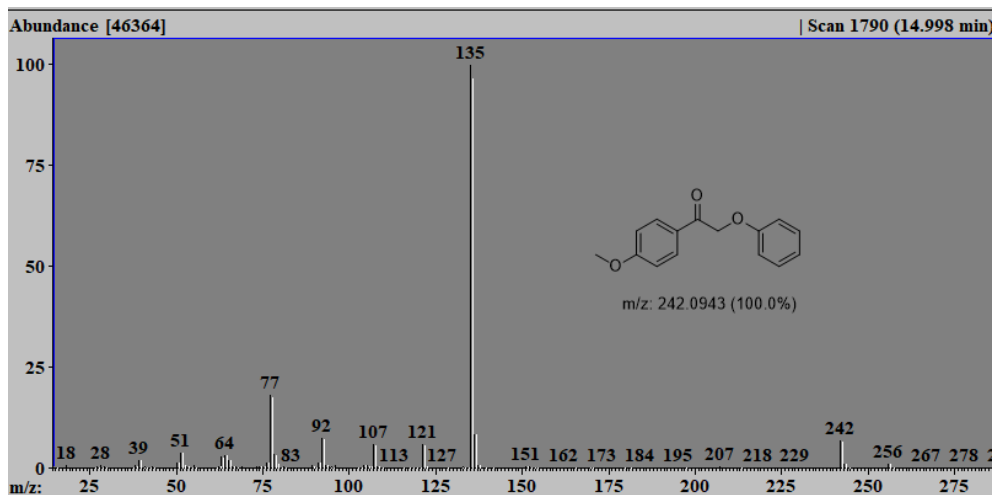

Figure S6. The GC and GC-MS spectra for the reaction of 2-phenoxy-1-(4-methoxyphenyl)ethanone in the methanol

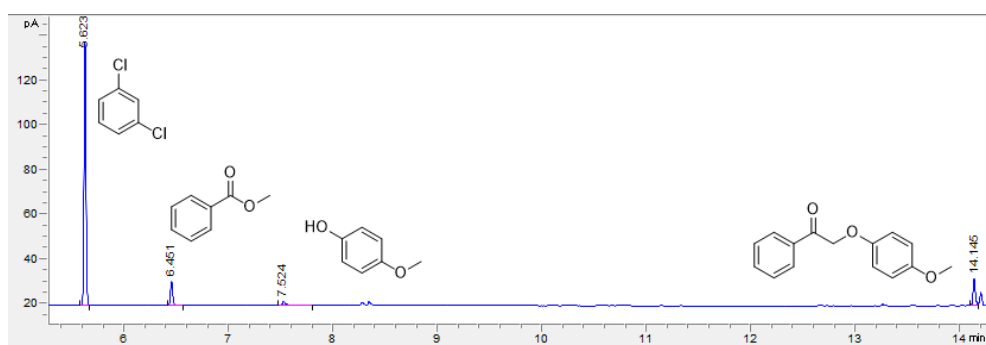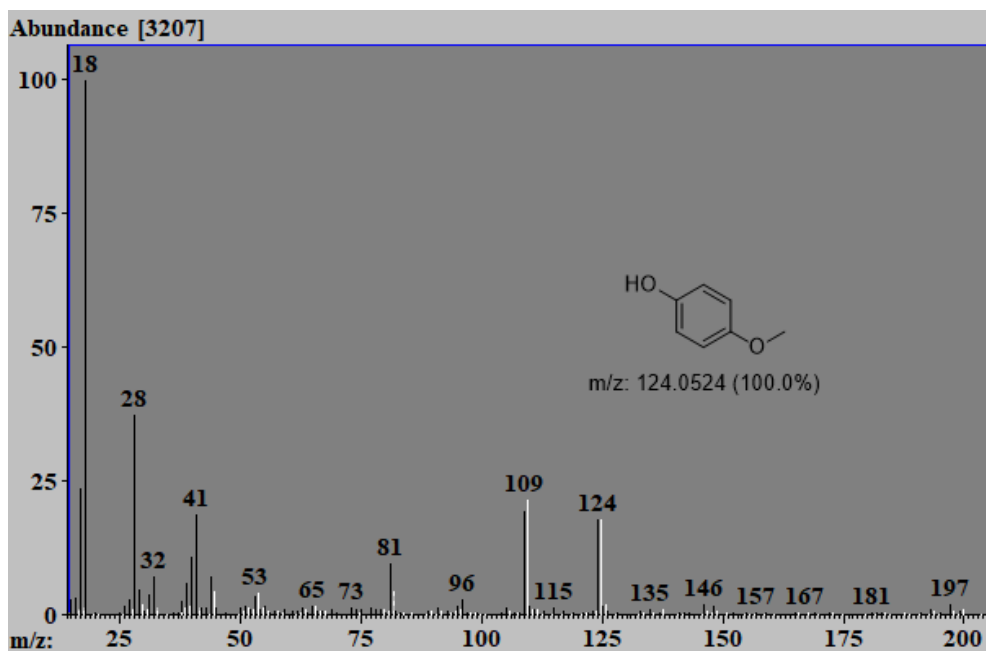

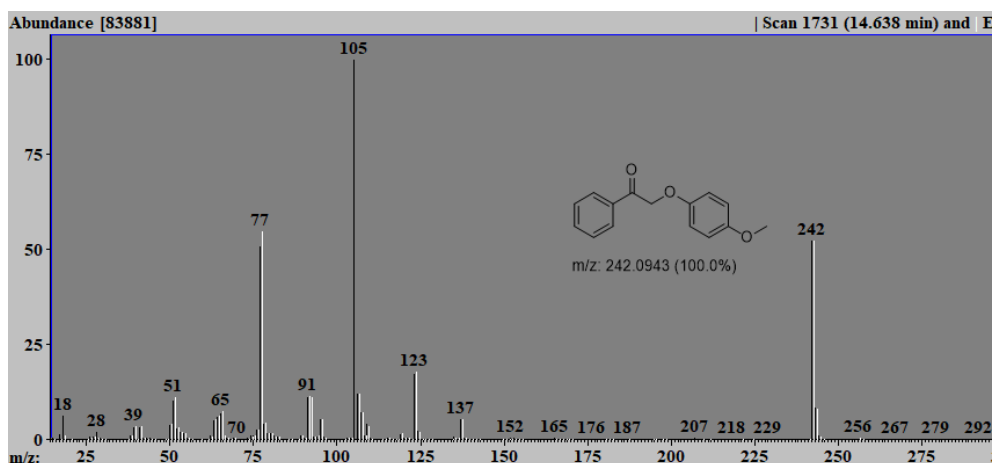

Figure S7. The GC and GC-MS spectra for the reaction of 2-(4-methoxyphenoxy)-1-phenylethanone in the methanol

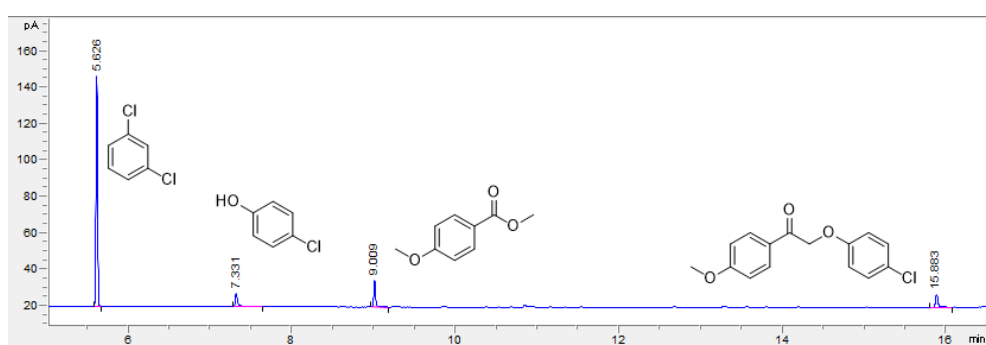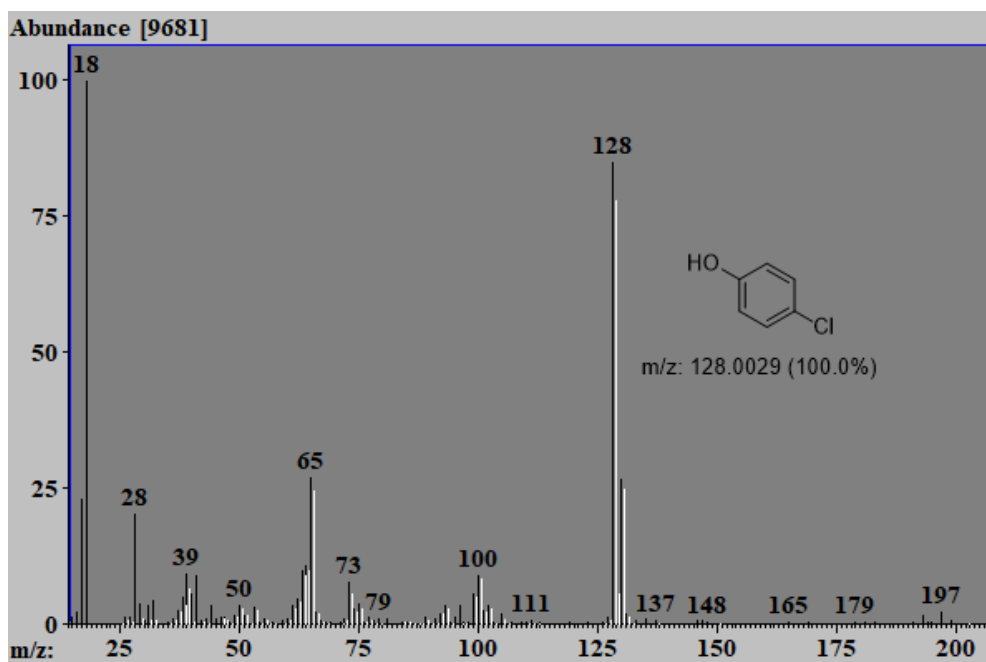



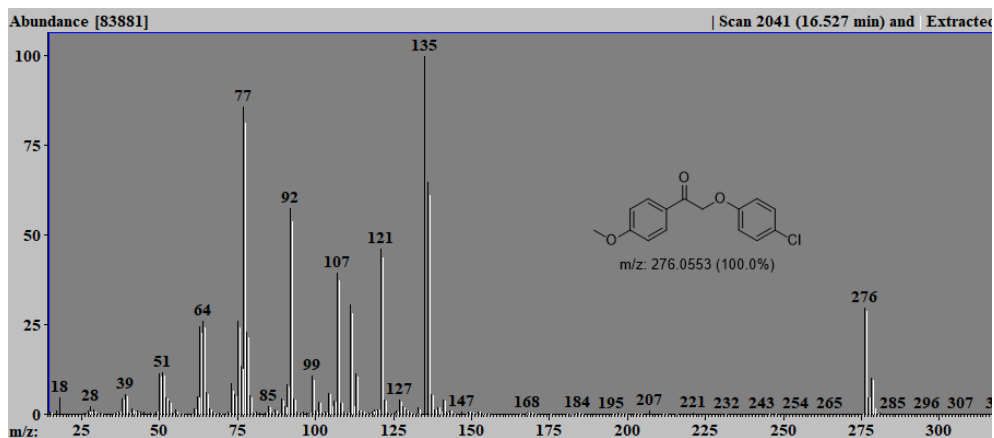

Figure S8. The GC and GC-MS spectra for the reaction of 2-(4-methoxyphenoxy)-1-(4-chlorophenyl)ethanone in the methanol

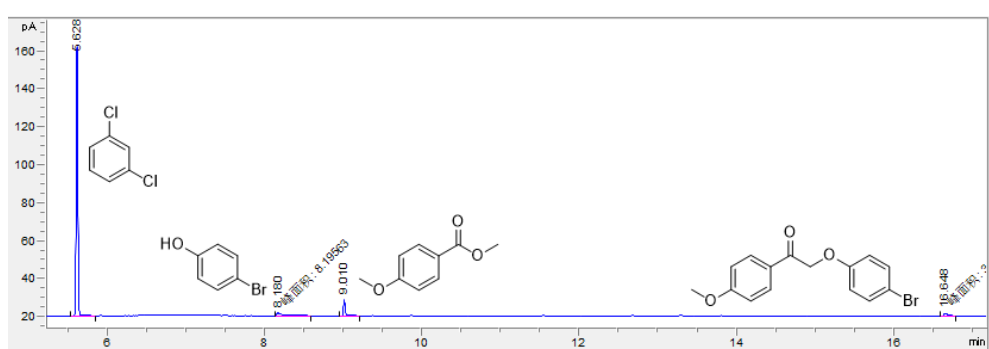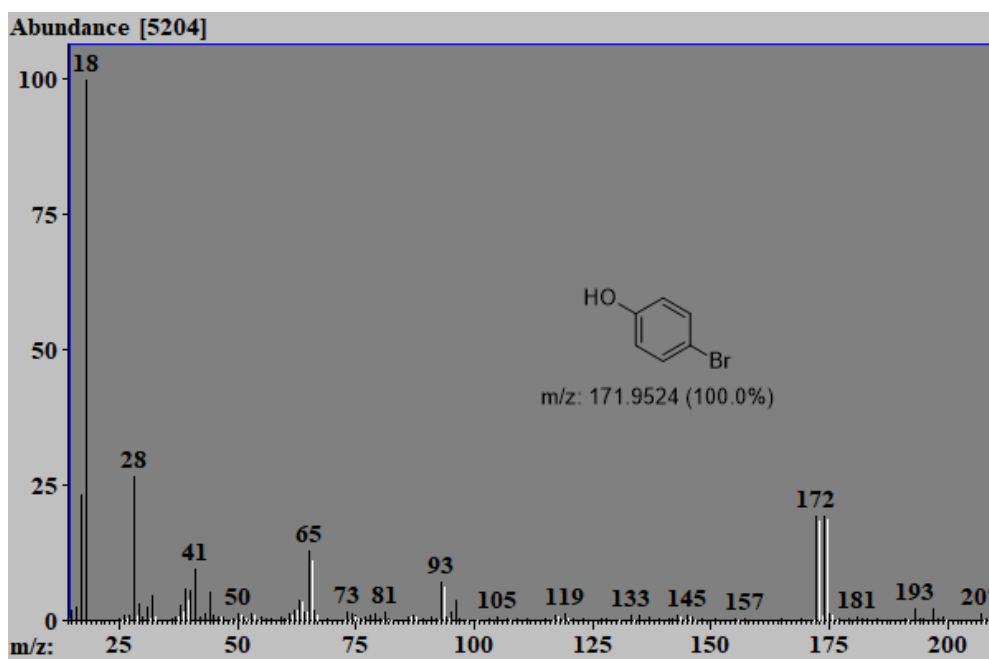

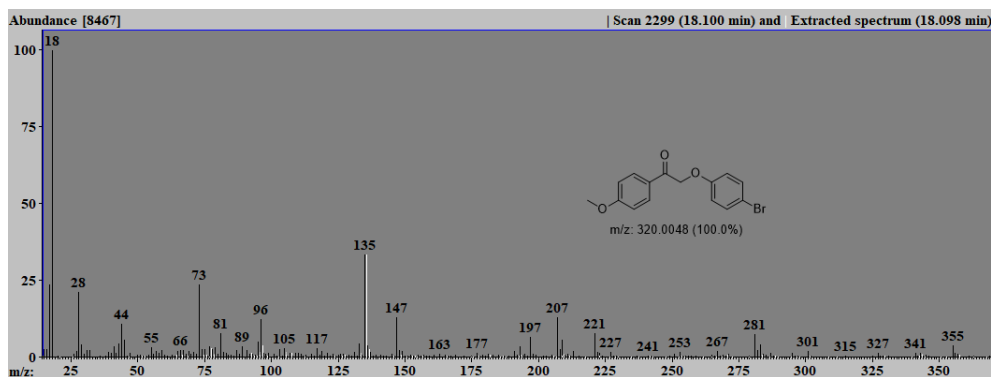

Figure S9. The GC and GC-MS spectra for the reaction of 2-(4-methoxyphenoxy)-1-(4-bromophenyl)ethanone in the methanol

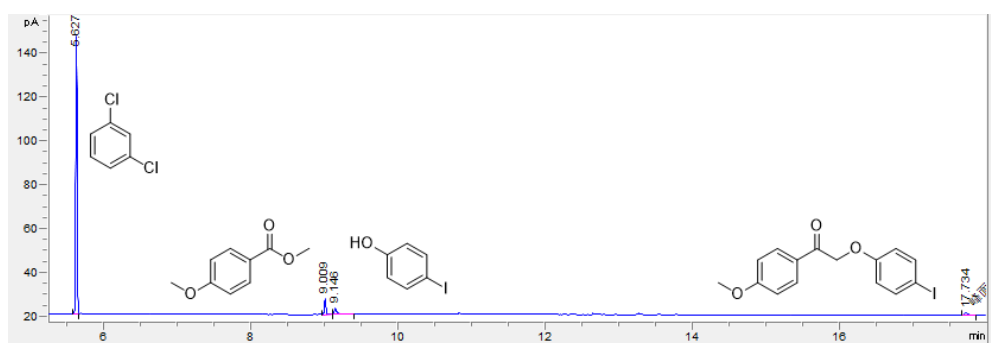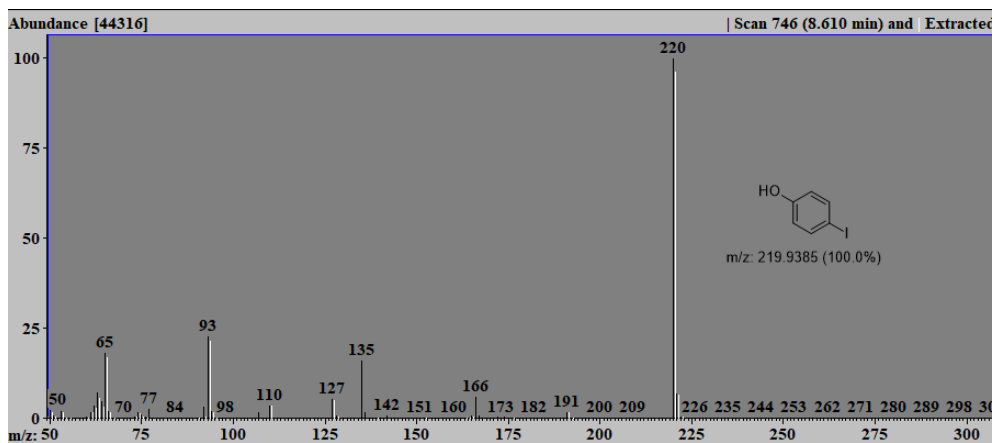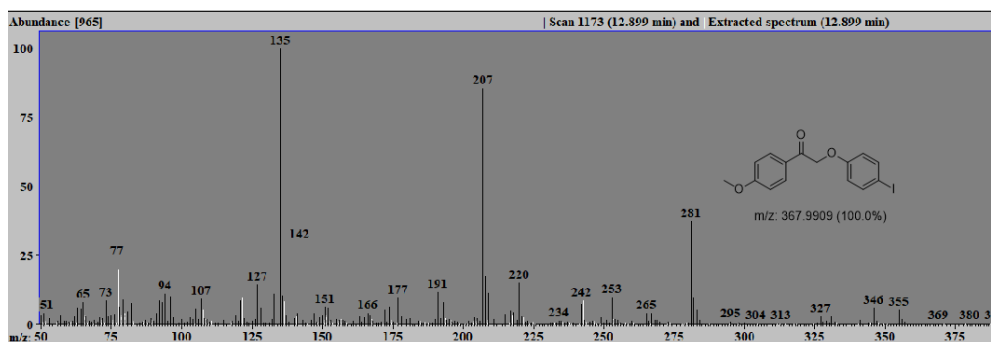

Figure S10. The GC and GC-MS spectra for the reaction of 2-(4-methoxyphenoxy)-1-(4-iodophenyl)ethanone in the methanol
